# 1 Identification of a signature of 2 evolutionarily conserved 3 stress-induced mutagenesis in 4 cancer

5 Luis H. Cisneros<sup>1,2,3,\*†</sup>, Charles Vaske<sup>1,4</sup>, Kimberly J. Bussey<sup>1,2,5†</sup>

\*For correspondence:  
[lhcisner@asu.edu](mailto:lhcisner@asu.edu) (LHC)

†These authors contributed  
equally to this work

6 <sup>1</sup>NantOmics, LLC, Santa Cruz, CA; <sup>2</sup>The BEYOND Center for Fundamental Concepts in  
7 Science, Arizona State University, Tempe, AZ; <sup>3</sup>Current affiliation: Biodesign Center for  
8 Biocomputing, Security and Society, Arizona State University, Tempe, AZ; <sup>4</sup>Current  
9 affiliation: Claret Bioscience, Santa Cruz, CA; <sup>5</sup>Current affiliation: Midwestern University,  
10 Glendale, AZ.

---

12 **Abstract** The clustering of mutations observed in cancer cells is reminiscent of the  
13 stress-induced mutagenesis (SIM) response in bacteria. SIM employs error-prone polymerases  
14 resulting in mutations concentrated around DNA double strand breaks with an abundance that  
15 decays with genomic distance. We performed a quantitative study on single nucleotide variant  
16 calls for whole-genome sequencing data from 1950 tumors and non-inherited mutations from  
17 129 normal samples. We introduce statistical methods to identify mutational clusters and  
18 quantify their distribution pattern. Our results show that mutations in both normal and cancer  
19 samples are indeed clustered and have shapes indicative of SIM. We found the genomic location  
20 of groups of close mutations are more likely to be prevalent across normal samples than in  
21 cancer suggesting loss of regulation over the mutational process during carcinogenesis.

---

## 23 Introduction

24 Genomic instability is a well known hallmark of cancer manifested as higher than normal rates of  
25 genomic mutations. However these mutations do not typically arise at uniformly random locations  
26 across the genome. Rather, they typically follow a non-uniform distribution resulting in mutational  
27 clustering *Drake (2007); Wang et al. (2007); Chen et al. (2009); Ye et al. (2010); Roberts et al. (2012);*  
28 *Nik-Zainal et al. (2012); Alexandrov et al. (2013); Kamburov et al. (2015); Nik-Zainal et al. (2016).*  
29 This phenomenon is observed in its extreme form as *kataegis*, consisting of six or more mutations  
30 with inter-mutational distances of 1 kb or less *Alexandrov et al. (2013); Nik-Zainal et al. (2016).*

31 In particular, large mutational loads in human cancer have been associated with replication re-  
32 pair deficiency *Campbell et al. (2017); Ma et al. (2018); Campbell et al. (2021)*, and thus underlying  
33 defects in the DNA repair machinery are thought to lead to biases in the types and locations of pas-  
34 senger mutations and structural events acquired during the progression of cancer. These general  
35 ideas justify targeting DNA repair and checkpoint inhibitors in cancer therapies *Murai (2017); For-*  
36 *ment and O'Connor (2018); Ubhi and Brown (2019); Zhu et al. (2020).* But given that most mutations  
37 are either neutral or deleterious, the likelihood that randomly distributed mutations would result  
38 in gains in fitness is considered to be low *Ram and Hadany (2014)*, whereas concerted patches  
39 of mutation, particularly when occurring within specific genes, could lead to neo-functionalization

40 and increased cellular fitness *Drake (2007); Ram and Hadany (2014); Cortés-Ciriano et al. (2020)*.

41 Previous work has shown that even though cancer samples typically exhibit a lot more muta-  
42 tions outside of genes, clustered mutations are enriched in genes relative to the intergenic spaces  
43 *Cisneros et al. (2017); Supek and Lehner (2017)*. In particular, mutation clustering in non-coding  
44 regions have been associated with structural changes that possibly cause elevated mutation rates  
45 but by themselves very rarely constitute driver mutations *Nik-Zainal et al. (2016); Rheinbay et al.*  
46 *(2020)*.

47 Other studies have identified the action of the AID/APOBEC family of cytosine deaminases as  
48 well as the action of Pol- $\eta$  as contributing mechanisms to the phenomenon of mutational clustering  
49 *Lada et al. (2012); Roberts et al. (2013); Taylor et al. (2013); Supek and Lehner (2017); Buisson et al.*  
50 *(2019); Roper et al. (2019); Shi et al. (2020)*. However these processes only explain a subset of the  
51 mutational clusters observed and thus a more general mechanism remains to be determined.

52 Stress-induced mutagenesis (SIM) in bacteria occurs when DNA damage happens in the con-  
53 text of additional cellular stress sufficient to initiate the SOS response *McKenzie et al. (2000); Foster*  
54 *(2007); Janion (2008); Shee et al. (2012); Rosenberg et al. (2012)*. SIM has been shown to increase the  
55 mutation rates locally around DNA lesions as cells strive to adapt to the challenging environment  
56 *Foster (2007); Rosenberg et al. (2012); Fitzgerald et al. (2017)*. In the course of double-strand-break-  
57 mediated mutagenesis in bacteria, DNA repair switches from high-fidelity homologous recombina-  
58 tion to a repair mechanism that relies on the error-prone DNA polymerase Pol IV, encoded by the  
59 gene *dinB*. The result of this mechanism is a spectrum of both single nucleotide variants (SNV)  
60 and copy number amplifications. The molecular signature of this process is a clustering of SNVs  
61 around the site of the double strand break (DSB) spanning hundreds of kilobases in size and with  
62 a decaying probability of mutation as a function of the distance from the DSB that remains above  
63 background for up to a megabase *Shee et al. (2012); Fitzgerald et al. (2017)*. The molecular finger-  
64 print associated with stress-induced mutagenesis manifests as a random probability distribution  
65 of SNVs centered on a putative DSB and with a decay distance of about two hundred kilobases  
66 *Rosenberg et al. (2012)*.

67 The evidence of clustering in cancer coupled with the known intra-tumor chromosomal struc-  
68 tural heterogeneity that characterizes many cancers *Roschke et al. (2002, 2003, 2005)* prompted  
69 us to inquire into a comparable process to bacterial stress-induced mutagenesis happening dur-  
70 ing carcinogenesis, an idea that has been previously suggested by Fitzgerald, Rosenberg and col-  
71 leagues *Fitzgerald et al. (2017); Xia et al. (2019)*. Adaptive mutagenesis has been recently shown  
72 in the context of the emergence of drug resistance, with evidence of down-regulation of mismatch  
73 repair (MMR) and homologous recombination (HR), and up-regulation of error-prone polymerases  
74 in drug-tolerant colorectal tumor cells *Russo et al. (2019)*. Furthermore an mTOR stress signaling  
75 has been shown to facilitate SIM in multiple human cancer cell lines exposed to non-genotoxic  
76 drug selection *Cipponi et al. (2020)*.

77 We investigated SNV distributions observed by whole genome sequencing of non-inherited mu-  
78 tations in normal samples and a wide variety of solid tumors. We found clear evidence of muta-  
79 tional clustering as demonstrated by enrichment of closer-than-expected mutations, particularly  
80 for samples with low mutational loads. Additionally, by characterizing the distributions of clusters  
81 we observed that there is a greater consistency of cluster locations across normal samples than  
82 in cancer samples, suggesting a degree of regulation control for mutations in normal tissue that  
83 breaks down during carcinogenesis. Finally, we identified the molecular signal of SIM in the SNV  
84 distributions of clustered mutations and showed a relationship with clinical outcome.

## 85 Results

### 86 Variant distribution is not uniform

87 We analyzed the patterns of mutational density across the genome in non-inherited mutations  
88 from 129 normal individuals (CGI data) as well as somatic mutations in 1950 tumors from 14 differ-

89 ent tissues (PCAWG data) (see section 1 for details), and compared them with simulated patterns of  
90  $N_{\text{SNV}} = 1000, 2500, 5000, 10000, 25000$  and  $50000$  total uniformly distributed mutations (500 replicates  
91 each).

92 First, we measured the distribution of inter-SNV distances  $x$  as a function of the total number  
93 of mutations. This is, for each sample we find the number of segments with length  $x$  inside each  
94 15 kb bin up to 150 kb, and plot against the total mutational load of the sample (Fig.1).

95 In both normal samples, Fig.1(B), and cancer samples, Fig.1(C), short intervals are more fre-  
96 quently observed than expected from a theoretical null model (see section 1), thus revealing a  
97 tendency of mutations to cluster together in genomic space. The effect is considerably stronger  
98 for lower values of the mutational load, particularly with  $N_{\text{SNV}} < 3000$  where the numbers of short  
99 segments ( $x \leq 15$  kb) can be over an order of magnitude larger than expected. On the other hand  
100 longer interval distances are progressively less over-represented: for  $x \sim 75$  kb they have appear  
101 at about the expected frequency.

102 As the total number of mutations increases we observe a drop in the theoretical prediction of  
103 numbers of inter-SNV segments. This drop is due to a saturation effect; as the number of uniformly  
104 distributed SNVs goes over 100,000, the expected inter-event distance in a 3 billion base genome  
105 would be under 30kb, and thus long intervals become more and more unlikely. Interestingly, in  
106 cancer samples the over-representation of small segments is prevalent even for large values of  
107 mutational loads. This effect is compensated with an under-representation of moderate to large  
108 length intervals, yet for very large mutational loads ( $N_{\text{SNV}} > 100,000$ ) long intervals are also more  
109 frequent than expected. This suggests that there are regions of the genome somehow avoided by  
110 mutations, manifesting in the form of unexpected long conserved, or protected, regions. These  
111 features are consistent across all samples and is evidently not associated to number fluctuations,  
112 since the dispersion in 500 simulated replicates cannot account for it (Fig.1(A)). From this analysis  
113 we conclude mutations in both normal and cancer samples tend to form groups.

114 We then looked at the number of groups, with “group” defined as a set of contiguous SNVs with  
115 inter-SNV distances  $x \leq D^*$  ( $D^* = 15$  kb) as a function of the mutational load. We deemed these  
116 groups *tuples*, while a *singleton* (i.e. a mutation that is not grouped) is simply a tuple of size  $n = 1$ .

117 The numbers of tuples and singleton variations for simulated, normal and cancer data are  
118 shown in Fig. 2(A). The most salient feature is that the frequency of singletons are significantly un-  
119 derrepresented for low mutational loads, while tuples are typically over-represented with respect  
120 to the theoretical expectation (Poisson point process model). The number of tuples is particularly  
121 high for samples with  $N_{\text{SNV}} < 3000$ , a mutational load for which a uniformly random process would  
122 very rarely lead to any proximal mutations. Namely, at  $N_{\text{SNV}} \sim 1000$  SNVs only a handful of tuples  
123 are expected yet dozens to hundreds are typically observed in cancer samples. And interesting  
124 conclusion of the observation that many groups form is that, though mutations tend to cluster  
125 together, they don’t do it as a large scale condensate, but rather in many small clusters. In partic-  
126 ular, mutations in normal samples seem to mainly aggregate in groups of 2 or 3 while mutations  
127 in cancer tend to cluster is groups of a much wider size spectrum (see Appendix section 1 for de-  
128 tailed distributions for different tuple sizes). On the other hand, as the total number of mutations  
129 increases the distributions approached the predicted curve, but then departed again. For large  
130 mutational loads the relationship between the proportion of tuples and singletons with respect  
131 to the expected behavior is inverted, supporting the idea that certain regions in the genome are  
132 protected from accumulation of mutations as singletons become very rare.

133 All together these observations demonstrate that the mutational rate is an heterogeneous prop-  
134 erty of the genome, and thus likely a regulated or constrained process. We hypothesize two, non-  
135 mutually exclusive basic ways to generate these kinds of mutational patterns:

- 136 1. The mutational process is modulated, such that it can be modeled as non-uniform Poisson  
137 process with a location-dependent rate  $\lambda(x)$  at location  $x$ . This modulation is an effect of  
138 differential DNA repair efficiencies along the genome, conservation or protection of certain

- 139 genomic regions due to topological or folding/packing molecular properties and other se-  
 140 quence or location dependent processes.  
 141 2. Mutations are inter-dependent events, entailing either nucleation of mutations during sub-  
 142 sequent DNA replications (i.e. mutations induce new errors) or a process in which events  
 143 happen together as a single burst of proximal mutations.

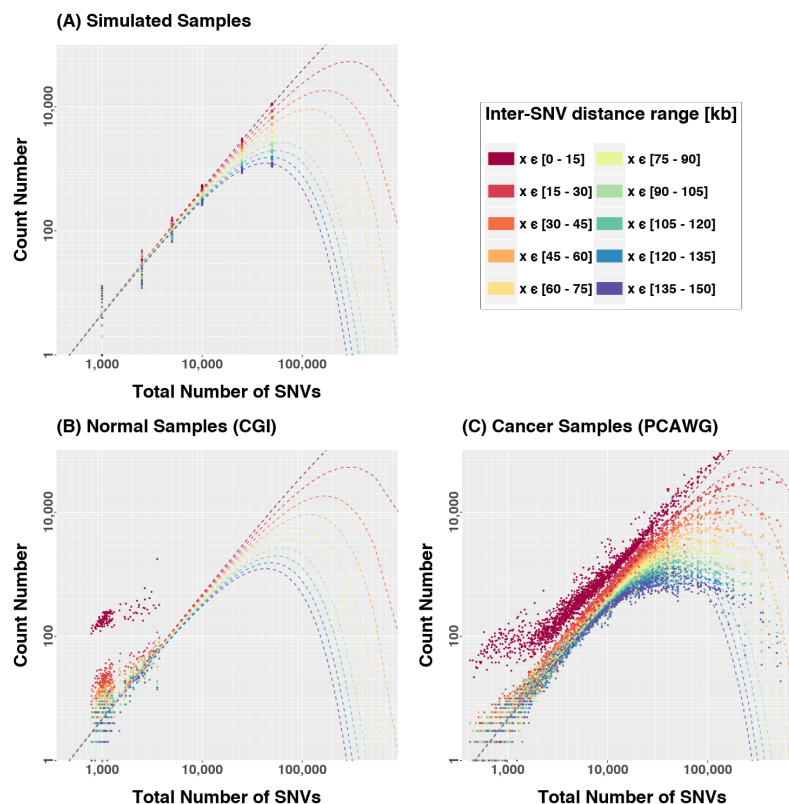

144

**Figure 1.** Number of inter-SNV segments of different lengths as a function of the mutational load in (A) Simulated, (B) Normal and (C) Cancer samples. Dashed lines are the theoretical predictions for a Poisson point process. Both normal and cancer cases show significant enrichment of small segments indicating that mutations are typically closer than expected.

145

146 Now, if the mutational process is dependent on genomic location, then tuples would tend to occur  
 147 at the same places across samples. We compared tuple distributions across samples for which tu-  
 148 ple enrichment was most obvious (Fig. 2(A)):  $N_s=129$  normal samples and  $N_s=784$  cancer samples  
 149 have  $N_{SNV} < 5100$ . We identified all regions in the genome containing tuples in at least  $\sqrt{N_s}$  of the  
 150 samples (corresponding to 8.8% of the normal samples and 3.5% of the cancer samples), provid-  
 151 ing confidence that our measurement is above the Poisson-counting statistical noise. For normal  
 152 samples (Fig. 2(B)) we found 128 regions with an overlap going as high as 30%. These regions were  
 153 no longer than 30 kb and about a quarter of them were single base locations repeatedly mutated  
 154 in several samples. Many of these regions were close together rendering more than 50 coarse-  
 155 grained ranges as shown in Fig. 2(B). In contrast, cancer samples had few overlaps. We observed  
 156 19 susceptible regions that coarse-grained to 5 distinct ranges (see Fig. 2(B)): a  $\sim 117$  kb region in  
 157 chromosome 6, associated to the human leukocyte antigen (HLA) complex, which contained tuples  
 158 in up to 7% of the samples, two  $\sim 1$  kb regions in chromosomes 2 and 3, a single point mutation in  
 159 chromosome 1 overlapping in  $\sim 4\%$  of the samples which is associated with the zinc finger protein  
 160 ZNF678 and a half kilobase region in chromosome Y with 11% overlap in the 479 male samples.  
 161 These results suggest that both processes of non-uniform mutation could be at play. The close  
 162 proximity of mutations in cancer seems to be driven by a process in which events are not neces-  
 163 sarily independent from each other, perhaps occurring simultaneously, yet otherwise distributed

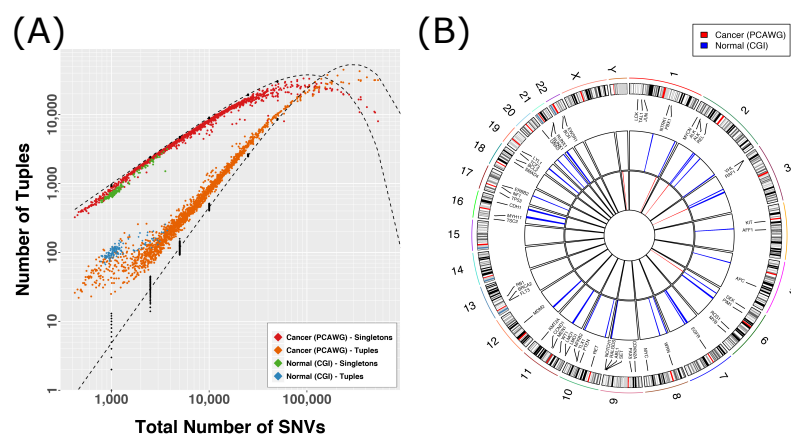

**Figure 2.** (A) Observed number of tuples and singletons as a function of the total mutational load. A tuple is a set of consecutive mutations with inter-event distance  $x \leq 15$  kb. A singleton is a mutation farther than 15 kb from any other mutation (1-tuple). Black dots are simulated data, dashed lines are the expected curves according to Poisson statistics. (B) Susceptible regions for  $N_{\text{SNV}} < 5100$ . In normal samples (blue) and cancer samples (red) all regions that are part of a tuple in at least 8.8% of the normal samples and 3.5% of the cancer samples, based on the square root of the number of samples. These regions are evidently more common in normal than in cancer samples.

164 mostly randomly across the genome and therefore not showing large overlap between samples.  
 165 In contrast, non-inherited mutations in normal tissue appear at least partially driven by a location-  
 166 specific and/or sequence-specific process, quite possibly sculpted by evolution and regulated  
 167 across the genome.

### 168 Quantification of Cluster Shapes

169 Previous work demonstrates that SNVs in both normal tissues and cancer cluster together and the  
 170 sequence context of both the reference and mutant calls can be used to infer mechanism *Roberts*  
 171 *et al. (2012)*. The association of APOBEC cytosine deaminases with clusters is well established  
 172 *Lada et al. (2012)*; *Burns et al. (2013)*; *Taylor et al. (2013)*; *Roberts et al. (2013)*, but it accounts for  
 173 at most 50% of the clusters observed *Roberts et al. (2013)*. Furthermore, there is nothing about the  
 174 mechanism of APOBEC that would suggest a characteristic shape of the clusters. In contrast, the  
 175 stress-induced mutational response of bacteria, mediated by Pol IV and encoded by *dinB*, leads to  
 176 a clustering pattern with a characteristic cluster shape where the number of SNVs in the center of  
 177 the cluster will be greater than those found at the edges *Shee et al. (2012)*. Therefore, we looked  
 178 at how both the number and shape of clusters, defined as statistically unlikely tuples of size  $n \geq 3$   
 179 (see 1), varied with total mutational load among non-inherited mutations or somatic mutations in  
 180 cancer.

181 Data simulated under the null hypothesis of uniform random mutation showed that as the total  
 182 number of SNVs increases, we expect to see the number of clusters and the fraction of SNVs in  
 183 those clusters increase (Fig. 3(A)-(B)). We note that, in agreement with observations presented  
 184 above, no clusters were observed in simulated data with mutational loads  $N_{\text{SNV}} < 2500$ , and a mean  
 185 of only four clusters per genome was detected in samples with 2500 mutations. This indicates  
 186 that under the null hypothesis at least several thousand mutations are required to observe any  
 187 measurable clustering. In contrast, both non-inherited mutations in normal tissue and somatic  
 188 mutations in cancer show extensive clustering when the mutational burden is this low (Fig 3(A)).  
 189 On the other hand, for very large numbers of mutations we observed a sudden plateau in the  
 190 number of clusters. Again, saturation is expected as in a genome 3 billion bases long 100,000  
 191 mutations yields an average inter-mutation distance of  $\sim 30$  kb, tuples would not be unlikely and  
 192 the thus number of statistically significant clusters would drop.

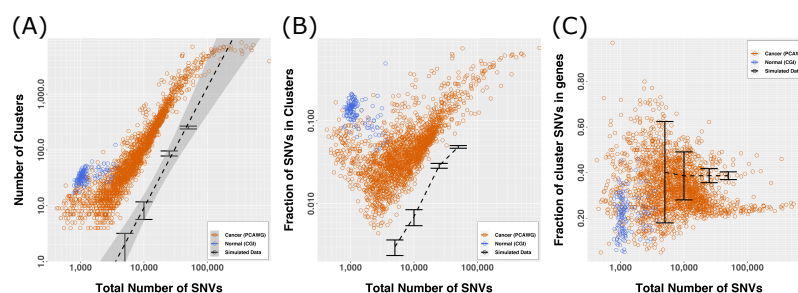

**Figure 3.** (A) Number of Clusters per sample as a function of the mutational load. Dashed line is the best fit for simulated data. Clustering is clearly larger than expected. The plateau at large  $N_{\text{SNV}}$  is related to the limit at which the average mutation distance in a background of 3 billion bases approaches 30 kb, which produces many statistically likely tuples and thus less clusters. (B) Fraction of SNVs in clusters versus  $N_{\text{SNV}}$ . The fraction of SNV in clusters increases with the number of mutations, suggesting that as more mutations are accumulated in the genome they are preferentially placed in clusters. (C) Fraction of SNVs in clusters in genes versus  $N_{\text{SNV}}$ , showing that cluster do not typically overlap genes for high  $N_{\text{SNV}}$ .

193 Figure 3(B) shows that as the number of mutations increase in cancer samples, the fraction of  
194 SNV in clusters increased as well. This suggests that as more mutations are accumulated, a larger  
195 fraction of those mutations are preferentially placed in clusters. Thus the clustering process itself  
196 could be implicated in the mechanism driving cancer mutations in some form of positive feedback  
197 loop or nucleation process. Another interesting observation is that the fraction of SNVs in cluster is  
198 very high for normal samples as compared to cancer samples with the same mutational load, and  
199 a load for which we don't expect any clustering under the null hypothesis. This indicates that the  
200 mutational process in normal samples is in fact driven by a mechanism that favors close proximity  
201 of variations, and is likely restricted to susceptible genomic regions as suggested by Fig.2(B).  
202 When we looked at whether the SNVs are found in genes or in intergenic regions, the null hypoth-  
203 esis predicts as the number of SNVs increases, the proportion of SNVs located in genes converges  
204 to about 40% and remains constant (Fig.3(C)). Private non-inherited (Normal) mutations converged  
205 to about 37% (range 31.3%-42.8%) of SNVs localizing within genes, while cancer was defined by a  
206 large amount of variability that converged to about 25% being located in genes.  
207 The clustering behavior for the cell-line set is somewhat consistent with cancer samples, but more  
208 intense: it shows more clusters, a larger fraction of SNVs in clusters and a rather low fraction of  
209 them localized in genes. In all cases these samples are equivalent to the most extremes cases in  
210 the cancer set in terms of clustering for the same mutational burden.  
211 In agreement with our previous study *Cisneros et al. (2017)*, SNVs in clusters in cancer are pref-  
212 erentially excluded from genes (Fisher's exact, Odds Ratio (OR) = 0.6002, 95% CI =0.5992-0.6013,  
213 p-value <  $2.2 \times 10^{16}$ ). When we looked specifically at the position of clusters within genes by count-  
214 ing SNVs that are in genes versus those that are not, we observed a slight enrichment for SNVs  
215 in clusters to be in the 3'-end of genes compared to SNVs that are not in clusters (Fisher's exact,  
216 OR = 1.024, 95% CI = 1.021-1.027, p-value =  $3.067 \times 10^{-57}$ ), confirming the observations of Supek and  
217 Lehner *Supek and Lehner (2015, 2017)*.  
218 To evaluate the shape of the clusters, we introduce the Stress-Introduced Heterogeneity (StH)  
219 score (see Methods and Fig. 6). The StH score was computed both on individual clusters (cluster  
220 StH) and over all clusters in a tumor (overall StH). In simulated data, increasing the number of SNVs  
221 led to decreasing overall StH scores (Fig. 4(A)) and produced a sigmoid shape for the variability in  
222 cluster StH measured by the inner-quartile range (IQR) (Fig. 4(B)). The overall StH score was higher  
223 in cancer than in normal samples. In comparison to the simulated data, overall StH scores were  
224 larger at the extremes of mutational burden and lower in the mid-range of total SNV count (Fig.  
225 4(A)). Moreover, cancer samples showed a greater diversity of StH scores than predicted under  
226 the assumption of random uniform mutations or compared to normal (Fig. 4(B)). Interestingly, the

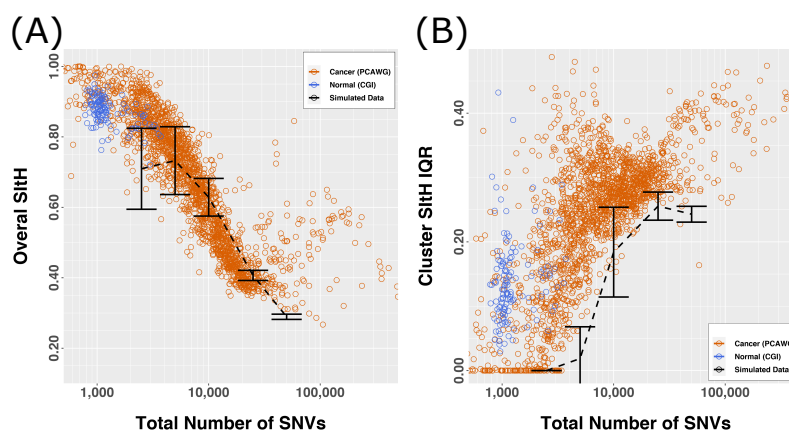

**Figure 4.** SiTH scores by number of SNVs. (A) Overall SiTH score as a function to the mutational load.(B) Inner-quartile range (IQR) of Cluster SiTH scores as a function of the mutational load.

227 diversity of cluster shapes reaches a plateau at mutational loads corresponding to higher than  
 228 expected overall SiTH scores. Combined, these results suggest the mutational clustering in cancer  
 229 is complex and likely driven by multiple mechanisms simultaneously.

### 230 **Survival Analysis**

231 A key characteristic of SNV clusters that result from stress induced mutation mechanisms is a decay  
 232 in the frequency of incidental SNVs as a function of distance from the DSB that triggered error-  
 233 prone repair response *Shee et al. (2012)*. We postulated that a more positive overall SiTH score  
 234 reflects a greater contribution of the adaptive mutation process to the mutational landscape of the  
 235 tumor. Therefore SiTH provides a measure of the evolutionary response, or the adaptive capacity,  
 236 of a tumor to a source of stress such as chemotherapy. Overall SiTH scores ranged from 0.145 to  
 237 0.999 (Fig. 4(A)) and varied significantly by organ site and whether the tumor was one of multiple  
 238 tumors from a single donor (ANOVA, organ,  $F = 136.70$ ,  $p < 2.2 \times 10^{-16}$ ; multiple tumor,  $F = 3.07$ ,  $p =$   
 239  $0.0799$ ; Maximum SiTH Score,  $F = 16.14$ ,  $p = 6.098 \times 10^{-5}$ ).

240 To determine the relationship between SiTH scores and clinical outcome, we conducted Cox Pro-  
 241 portional Hazard analysis of both overall SiTH score as well as the inter-quartile range of the cluster  
 242 SiTH. The models are specified as follows:

$$\text{Overall Survival} \sim \text{SiTH} + \text{multiple.tumor} + \text{is.Max.SiTH} + \text{strata(Organ)} \quad (1)$$

243 where the data analyzed were either primary tumors or the group of metastases and recurrences.  
 244 For inter-quartile range of the cluster SiTH the model is:

$$\text{Overall Survival} \sim \text{SiTH IQR} + \text{multiple.tumor} + \text{is.Max.SiTH} + \text{strata(Organ)} \quad (2)$$

245 After controlling for organ site and multiple tumor status, we found overall SiTH scores predict  
 246 patient survival but with different effects depending on whether the sample was a primary tumor  
 247 or from a metastasis or recurrence. In primary tumors, more positive overall SiTH scores predicted  
 248 better patient survival (Cox Proportional Hazard Regression (CPHR), Hazard Ratio (HR) = 0.4516,  
 249 95% CI: 0.2274 -0.8968,  $p=0.0231$ , see Supplemental Fig. 5). However, when the recurrences and  
 250 metastatic tumors were considered as a group, the overall SiTH score predicted a worse survival,  
 251 with a HR of 14.84 (CPHR, 95% CI: 1.934-113.876,  $p= 0.00947$ ). When we looked at the diversity  
 252 of SiTH scores on a cluster basis, the type of tumor sample was no longer relevant. The inner  
 253 quartile range (IQR) of cluster-level SiTH scores associated with worse survival, with a HR of 5.744  
 254 (CPHR, 95% CI: 1.824 -18.09,  $p= 0.00283$ ). We then asked whether there was a difference in survival  
 255 between patients with SiTH IQRs above or below the median SiTH IQR, as clinical translation will

256 likely require a creating a cut-off value above which one would predict poor prognosis. As is seen in  
 257 Fig. 5, there is a significant difference in survival, even after accounting for the baseline differences  
 258 in survival by tissue of origin (CPHR, HR = 1.26, 95% CI: 1.043-1.531, p= 0.0168).

### 259 Effects of the maximum inter-SNV distance in the definition of clusters

260 Our definition of a cluster is a tuple with a probability of less than 1% as measured by a negative  
 261 binomial test. The test is conducted so that a given tuple might not satisfy the second condition but  
 262 part of it might (e.g. one with a higher concentration of mutations in one end). In this case only that  
 263 portion of the tuple is called a cluster. The specific value  $D^* = 15$  kb was chosen because it's a good  
 264 balance between signal and noise: (a) if  $D^*$  is too small, very few clusters are found unless the total  
 265 number of mutations is very large. Even though less clusters are found the restrictive condition  
 266 given by  $D^*$  yields more concentrated clusters with small dispersion as measured by the SitH IQR.  
 267 (b) On the other hand if  $D^*$  is too large many clusters are found and the noise level is larger. In  
 268 this case there is more room for different configurations of clusters, producing larger values of the  
 269 IQR. Low to moderate mutational loads typically have smaller SitH scores since clusters tend to be  
 270 more uniform (i.e. less peaked), but samples with large mutational loads exhibit saturation effects  
 271 that limit the number of clusters (i.e. if tuples are common then they are not clusters). There is  
 272 therefore a trade-off between the effects on smaller and larger mutational loads. In order to find a  
 273 good signal-noise balance we ran our analysis with 8 different values of  $D^*$ . Tables 1 and 2 show the  
 274 correlations between the overall SitH score and SitH IQR in cancer samples. Based on these results  
 275 we conclude that  $D^* = 15$  kb is a good choice: result values are well correlated with cases in both  
 276 ends, indicating that this parameter captures well the signal for both small and large mutational  
 277 loads without too much compromise on the quality.

| SitH | 1kb         | 2kb         | 5kb         | 10kb        | 15kb        | 20kb        | 25kb        | 50kb        |
|------|-------------|-------------|-------------|-------------|-------------|-------------|-------------|-------------|
| 1kb  | 1           | 0.988498379 | 0.953254764 | 0.913062667 | 0.885251282 | 0.872055507 | 0.86602581  | 0.890076618 |
| 2kb  | 0.988498379 | 1           | 0.979158317 | 0.944003381 | 0.914886845 | 0.896847418 | 0.884576285 | 0.885092543 |
| 5kb  | 0.953254764 | 0.979158317 | 1           | 0.981798123 | 0.95732091  | 0.937928221 | 0.92095692  | 0.885284312 |
| 10kb | 0.913062667 | 0.944003381 | 0.981798123 | 1           | 0.988106173 | 0.973637963 | 0.957521878 | 0.900404232 |
| 15kb | 0.885251282 | 0.914886845 | 0.95732091  | 0.988106173 | 1           | 0.992613883 | 0.980773228 | 0.919694508 |
| 20kb | 0.872055507 | 0.896847418 | 0.937928221 | 0.973637963 | 0.992613883 | 1           | 0.993667498 | 0.939087871 |
| 25kb | 0.86602581  | 0.884576285 | 0.92095692  | 0.957521878 | 0.980773228 | 0.993667498 | 1           | 0.957075149 |
| 50kb | 0.890076618 | 0.885092543 | 0.885284312 | 0.900404232 | 0.919694508 | 0.939087871 | 0.957075149 | 1           |

**Table 1.** Correlation of overall SitH scores for different  $D^*$  values with PCAWG data.

| SitH IQR | 1kb         | 2kb         | 5kb         | 10kb        | 15kb        | 20kb        | 25kb        | 50kb        |
|----------|-------------|-------------|-------------|-------------|-------------|-------------|-------------|-------------|
| 1kb      | 1           | 0.938197026 | 0.838362333 | 0.78391552  | 0.737391598 | 0.688942755 | 0.65370155  | 0.445513598 |
| 2kb      | 0.938197026 | 1           | 0.906115983 | 0.830270283 | 0.774522805 | 0.721045756 | 0.680923471 | 0.454410934 |
| 5kb      | 0.838362333 | 0.906115983 | 1           | 0.921681646 | 0.848406024 | 0.784003812 | 0.736097232 | 0.493501676 |
| 10kb     | 0.78391552  | 0.830270283 | 0.921681646 | 1           | 0.933918906 | 0.868093155 | 0.815392267 | 0.584146019 |
| 15kb     | 0.737391598 | 0.774522805 | 0.848406024 | 0.933918906 | 1           | 0.941611092 | 0.882449786 | 0.664941136 |
| 20kb     | 0.688942755 | 0.721045756 | 0.784003812 | 0.868093155 | 0.941611092 | 1           | 0.944940353 | 0.736770549 |
| 25kb     | 0.65370155  | 0.680923471 | 0.736097232 | 0.815392267 | 0.882449786 | 0.944940353 | 1           | 0.789022886 |
| 50kb     | 0.445513598 | 0.454410934 | 0.493501676 | 0.584146019 | 0.664941136 | 0.736770549 | 0.789022886 | 1           |

**Table 2.** Correlation of SitH IQR scores for different  $D^*$  values with PCAWG data.

## 278 Discussion

279 Our study provides evidence that a signature of stress-induced mutagenesis, characterized by clus-  
 280 ters of SNVs with a defined geometry, is widespread across multiple cancer types. Furthermore,



(A)

(B)

**Figure 5.** Survival difference based on Slth score IQR being above or below the median Slth score IQR. a) Kaplan-Meier curves for tumors with cluster-level Slth IQR above and below the median Slth IQR for 1895 tumors. b) Results from the Cox Proportional Hazard analysis. Survival data from 1950 tumors, of which 1201 samples had Slth IQR scores in 14 different cancer types were used. Hazard ratio for IQR group was controlled for by multiple tumors, maximum IQR value and tissue of origin.

281 the association of both overall cluster shape and increased cluster shape variability with patient  
282 survival suggests stress-induced mutation has a clinical impact. Both the overall SitH value and the  
283 heterogeneity represented by the SitH IQR are likely derived from a combination of the strength  
284 of stress-induced mutation as a mutational process within a tumor and the clonal diversity of the  
285 tumor, both of which would be expected to impact disease outcome *Andor et al. (2016)*. The rela-  
286 tionship between overall SitH and SitH IQR with respect to survival suggests cluster heterogeneity  
287 predominantly represents a combination of the amount of time stress-induced mutagenesis has  
288 been active during carcinogenesis and clonal heterogeneity, while overall SitH represents the ra-  
289 tio of stress-induced mutagenesis relative to other mutational processes. Our work showed an  
290 increase in mutational load leads to both increasing cluster sizes as well the percentage of SNVs  
291 involved in clusters, but only up to a point. In tumors with high mutational burdens, the number  
292 of clusters, the genomic distance covered by cluster, and the number of SNVs contained within a  
293 cluster plateau. This implies that under high mutational burden the variations in mutation density  
294 across the genome flatten out, likely due to alterations in DNA repair pathways such as a loss of  
295 mismatch repair *Supek and Lehner (2017)*; *Campbell et al. (2017)*, and obscure the detection of  
296 clusters.

297 The influence of intra-tumor diversity on clinical outcome is an area of active investigation. Evi-  
298 dence from measures of clonal diversity and copy number diversity are associated with worse out-  
299 come and therapeutic response *Andor et al. (2016)*; *Davoli et al. (2017)*; *Roh et al. (2017)*; *Dagogo-*  
300 *Jack and Shaw (2017)*; *Turajlic et al. (2019)*; *Ben-David and Amon (2019)*. However, cancer must  
301 balance the introduction of genomic rearrangements that contribute to cellular diversity with a suf-  
302 ficient level of genome stability to avoid a genomic error catastrophe. Our results are consistent  
303 with this notion in that very large positive overall SitH scores associates with better patient survival.  
304 The SitH IQR represents a measure of mutational heterogeneity that ties intra-tumor diversity to  
305 a mutational process underlying an evolutionarily conserved response to cellular stress. The di-  
306 versity measured by the SitH IQR is a measure of the heterogeneity of adaptive strategies within  
307 a patient. This diversity manifests as a broader ensemble of mutational cluster shapes within a tu-  
308 mor driven by the heterogeneity in mutational processes to generate genomic diversification. This  
309 in turn increases the substrates available for broad phenotypic plasticity, including transcriptional  
310 responses. Such responses have been shown to be important in the rapid acquisition of resistance  
311 to doxorubicin *Wu et al. (2015)*. In this case high diversity becomes a direct survival advantage for  
312 the tumor, allowing it to respond to a wider range of stresses and leading to a poor outcome for  
313 patients.

314 Others have found clustered mutations and proposed mechanisms for them *Roberts et al. (2012)*;  
315 *Lada et al. (2012)*; *Burns et al. (2013)*; *Taylor et al. (2013)*; *Roberts et al. (2013)*; *Supek and Lehner*  
316 *(2017)*. Our definition of mutational clusters spanning over kilobase distances *Shee et al. (2012)*;  
317 *Fitzgerald et al. (2017)* is broader than that of Supek and Lehner who showed Pol- $\eta$ , a TLS poly-  
318 merase closely related to Pol IV, is involved in the generation of clustered mutations that prefer-  
319 entially locate to the 3'-end of active genes *Supek and Lehner (2015)*. However, we were able to  
320 confirm that key finding with our cluster definition.

321 An open question that remains is whether the clusters we and others detect arise from single  
322 events reflective of bursts of mutational activity or are accumulated over time, therefore marking  
323 regions of the genome prone to mutation. Allele fraction has been suggested as one way to ad-  
324 dress this question. However, the precision of most allele fraction measurements prevents the  
325 accurate discrimination of varying degrees of heterogeneity across a tumor. For example, the  
326 95/95 binomial tolerance interval for a true allele fraction of 0.5 at a read depth of 60x ranges from  
327 0.25 to 0.75 (see Appendix). This interval represents the bounds in which we are 95% confident  
328 that 95% of the measurements of a true allele fraction of 0.5 will lie. If we have a cluster where the  
329 allele fractions of the SNVs all fall within this range, we cannot rule out they actually represent a  
330 true allele fraction of 0.5 and therefore all come from the same event. Experimental evidence in  
331 mammalian systems leading to cluster formation is necessary to answer this question. This is an

332 important study to pursue as the strategies one might propose for influencing mutational patterns  
 333 with impact on clinical outcomes will depend on whether the target is the mutational process itself  
 334 or the regions of the genome being acted upon by the mutational process.

### 335 Conclusions

336 Cancer is notorious for outsmarting the physician. To make progress we need to factor in how  
 337 cancer cells evolve and adapt in the face of treatment challenges. Understanding the mechanisms  
 338 of mutation and adaptation in cancer is therefore an essential pre-requisite for improving patient  
 339 outcomes. Stress-induced mutagenesis, an ancient and evolutionarily conserved adaptive muta-  
 340 tion mechanism well-characterized in *E. coli*, underlies in part the genomic instability seen in cancer  
 341 and contributes to the ability of the tumor to evolve resistance to therapy [Fitzgerald et al. \(2017\)](#).  
 342 We have described a way to quantify this antagonism and shown that SIM has a strong association  
 343 with poor prognosis. Further investigations into the process of SIM in cancer should lead to bet-  
 344 ter patient outcomes by giving clinicians a measure allowing them to tailor treatment that checks  
 345 tumor progression while minimizing the risk of triggering an aggressive evolutionary response.

### 346 Methods

#### 347 Null model - Uniform random mutations

348 A uniform distribution of point mutations can be modeled as a Bernoulli process. Because the total  
 349 number of mutations is typically much smaller than the number of nucleobases in the genome the  
 350 expected inter-event distance can be approximated as an exponential function. This distribution  
 351 is equivalent to the expression for the waiting time distribution in a Poisson process [Cinlar \(1975\)](#)  
 352 or the survival density function in a constant hazard process [Moore \(2016\)](#).  
 353 The probability of observing an inter-event distance  $x$  is given by the density function:

$$f(x) = \lambda e^{-\lambda x} \quad (3)$$

354 Where  $\lambda = N_{\text{SNV}}/L$  is the mutational rate,  $N_{\text{SNV}}$  the total number of SNV mutations and  $L$  the length  
 355 of the genome. The probability of  $x \leq D$ , or *cumulative waiting time function*, is

$$F(D) = \int_0^D f(x)dx = 1 - e^{-\lambda D} \quad (4)$$

356 and the probability of  $x > D$ , or *survival function*, is  $S(D) = 1 - F(D) = e^{-\lambda D}$ .

357 The probability associated with the range of interval lengths  $[d_i, d_i + D_{\text{bin}}]$  is

$$P_i = F(d_i + D_{\text{bin}}) - F(d_i) = e^{-\lambda d_i} \cdot (1 - e^{-\lambda D_{\text{bin}}}) = S(d_i) \cdot F(D_{\text{bin}}) \quad (5)$$

358 And the expected number of intervals with length in this range is  $E_i = N_{\text{SNV}} \cdot P_i$ .

359 We define a  $n$ -tuple as a set of  $n$  consecutive mutations that are closer than  $D^* = 15$  kb. By definition  
 360 all tuples are separated by intervals  $x > D^*$  from each other. In particular 1-tuples, or *singletons*,  
 361 are those SNVs that are farther than  $D^*$  bases from its closest neighbors.

362 From eq. (5) the probability of  $x \leq D^*$  is  $F^* = 1 - e^{-\lambda D^*}$  and the probability of  $x > D^*$  is  $S^* = e^{-\lambda D^*}$ .

363 The expected total number of tuples can be estimated as:

$$T^* = N_{\text{SNV}} \cdot S^* = N_{\text{SNV}} \cdot e^{-\lambda D^*} \quad (6)$$

364 The total number of mutation events in tuples can be estimated as  $E^* \sim N_{\text{SNV}} \cdot F^*$ , where the iden-  
 365 tity is not exact because of edge effects; for instance, location differences are calculated on each  
 366 chromosome (except Y) independently and therefore the total number of inter-mutation intervals  
 367 is  $N_{\text{SNV}} - 25$ .

368 Following these definitions, the probability of observing a  $n$ -tuple can be written as the combination  
 369 of probabilities:

$$P^*(n) = (S^*)^2 (F^*)^{n-1} = e^{-2\lambda D^*} \cdot (1 - e^{-\lambda D^*})^{n-1} \quad (7)$$

370 Thus the expected number of  $n$ -tuples is  $N^*(n) = N_{\text{SNV}} \cdot P^*(n)$  and the probability mass function of  
371  $n$ -tuples is

$$P_n = \frac{N^*(n)}{T^*} = S^*(F^*)^{n-1} = e^{-\lambda D^*} \left(1 - e^{-\lambda D^*}\right)^{n-1}, \quad (8)$$

372 which is equivalent to the binomial mass function of the first order  $P_r(1, s, \lambda)$ .

### 373 Data

374 We obtained variant calls for normal and cancer from public repositories where all cases had been  
375 called by a standard pipeline. For non-inherited mutations in normal tissue, we used WGS data  
376 from the Complete Genomics Indices database in the 1000 Genome Project *The 1000 Genomes*  
377 *Project Consortium (2015)*(release 20130502, see Supplementary Materials Table 7 in Cisneros, et  
378 al. *Cisneros et al. (2017)* for a list of donors). This data has average genome coverage of 47X.  
379 The VCFs of 129 trios were analyzed using the `vcf_contrast` function from the `VCFtools` analysis  
380 toolbox to compare each child with the two corresponding parents. The resulting potential novel  
381 variants were then filtered such that the child and both parents must be flagged as PASS (the variant  
382 passed all filters in the calling algorithm); the child must have a read depth of at least 20; and the  
383 alternative (aka novel) allele frequency was  $\geq 0.35$ . For cancer, we analyzed the simple somatic  
384 mutations and corresponding clinical data from the PCAWG coordinated WGS calls for 1950 tumor  
385 samples from 1830 donors representing 14 different primary sites *Campbell et al. (2017)*. Somatic  
386 variants for all data sets were classified as previously published *Cisneros et al. (2017)*.

387 We generated 500 sample replicates for eight groups of simulated data defined by their total mu-  
388 tational load ( $N_{\text{SNV}} = 500; 1000; 2500; 5000; 10,000; 25,000; 50,000; 100,000$ ). We modeled a uniform,  
389 random distribution of SNVs across the genome as a one-dimensional Bernoulli Process, corre-  
390 sponding to our null hypothesis. The number of events in a region of size  $X$  is a random variable  
391 with a probability mass function that can be approximated as a Poisson distribution:

$$P(n) = \frac{(X \cdot \lambda)^n}{n!} e^{-(X \cdot \lambda)} \quad (9)$$

392 with  $\lambda = (N_{\text{SNV}}/L)$  the total mutational rate and  $L$  the genome length.

393 In order to characterize the clustering of genomic mutations we defined a tuple as a set of consec-  
394 utive SNVs such that the inter-event distance  $x < D^* = 15$  kb for all event pairs in it. According with  
395 Poisson statistics (per equation 8) the expected number of  $n$ -tuples in a sample with  $N_{\text{SNV}}$  mutation  
396 is given as

$$N_T(n) = N_{\text{SNV}} \left(1 - e^{-\lambda D^*}\right)^{n-1} e^{-\lambda D^*}. \quad (10)$$

### 397 Detection of mutation clusters

398 A group of SNVs is deemed a “cluster” if it is a tuple of at least 3 variations and the probability of  
399 finding it by chance is less than 1% according to the negative binomial regression given by the total  
400 rate of observed mutations in the genome. In other words, the particular group of variations is  
401 statistically unlikely to happen in the background given by the mutational load of the sample. For  
402 each WGS sample in our database, all possible clusters were identified and the “center of mass”  
403 (genomic location of cluster centroid) in each case is calculated along with other properties like  
404 start and end locations, length and size (number of variations) *Cisneros et al. (2017)*.

### 405 Detection of cluster shape

406 We treated cluster centroids as likely locations of the DSBs that induced the accumulation of vari-  
407 ations. Therefore, the expected signature for stress-induced mutagenesis should be evident as a  
408 concentration of mutations around these centroids that decays with distance. Thus, for each clus-  
409 ter  $i$  we computed the cumulative distribution of SNV events  $F_i(X)$ , as a function of the distance  $X$   
410 from the cluster centroid up to 250 kb and in both the 3' and the 5' directions. By aggregating to-  
411 gether all cumulative distributions observed in each sample we generated a representative overall  
412 curve  $F(X) = \sum F_i(X)$  that conveys the probability of finding a mutation at a given distance from

413 a cluster center. If the distribution of SNV events were uniformly random (and therefore do not  
414 typically decay) then  $F(X)$  is expected to increase proportionally with  $X$ . This assumption gives us  
415 a background of mutations against to which we can compare the observed distribution pattern.  
416 It is important to note that this definition is itself independent of the definition of clusters. By  
417 construction, if the background distribution is uniform as assumed, then we should not observe  
418 clusters at all since they are statistically unlikely by random chance. In order to define a useful  
419 score, we normalize  $X$  by 250 kb and  $F$  by the number of events closer than 250 kb, thus mapping  
420 all cluster-associated cumulative distribution curves to a unit box:

$$\frac{X}{250\text{kb}} \rightarrow x \quad ; \quad x \in [0, 1]$$

$$\frac{F(X)}{F(250\text{kb})} \rightarrow f(x) \quad ; \quad f(x) \in [0, 1]$$

421 If the null hypothesis were correct for these events,  $f(x) = x$ . We define a measure of the de-  
422 gree of deviation from the null hypothesis by integrating the difference between the normalized  
423 cumulative distribution  $f(x)$  and the expected value  $x$  as follows:

$$S(f(s)) = 2 \cdot \sum_{x=0}^{x=1} (f(x) - x) \quad (11)$$

424 The value of  $S$  is a signed statistic with range  $S \in [-1, 1]$  (see Figure 6). As  $S$  approaches one, smaller  
425 windows close to the origin (cluster center) contain more events than expected from a random  
426 uniform distribution, indicating that SNV events concentrate near the center of the clusters and  
427 sharply decay with the distance. A negative value indicates that the events are typically depleted  
428 from the center and concentrated on the edges of the cluster, and values of  $S$  close to zero indicate  
429 that the concentration of events is mostly uniform across the 250 kb interval length, supporting the  
430 null hypothesis. We call this the **Overall Stress Introduced Heterogeneity** score, or **SItH** score,  
431 of the distribution of somatic SNVs and use it to address the typical cluster geometry in a sample.  
432 Following the same definition on individual clusters we can estimate a **Cluster SItH** score using  
433 the function  $F_i(X)$  instead of  $F(X)$ , thus leading to  $S_i = S(f_i(x))$ . This definition is statistically less  
434 robust than the overall measure but allows us to assess the diversity of behaviors in clusters within  
435 a sample. We do this by estimating the quartile statistics on the ensemble of  $S_i$  values for each  
436 sample.

### 437 Code Availability

- 438 • Code to compute SItH scores is available upon request: Charles Vaske at [Charlie.Vaske@nantomics.com](mailto:Charlie.Vaske@nantomics.com).
- 439 • Code for all other analysis, including data sets with computed SItH scores, is available at:  
440 <https://github.com/kjbussey/SItH>.

### 442 Data Availability

443 All data in this study are publicly available for analysis:

- 444 • Cancer data: <https://dcc.icgc.org/pcawg>.
- 445 • Normal tissue variant data from the Complete Genomics Indices database in the 1000  
446 Genome Project (release 20130502):  
447 [ftp://ftp.1000genomes.ebi.ac.uk/vol1/ftp/release/20130502/supporting/cgi\\_variant\\_calls/](ftp://ftp.1000genomes.ebi.ac.uk/vol1/ftp/release/20130502/supporting/cgi_variant_calls/)

### 448 Acknowledgments

449 We thank Paul Davies, Adam Orr, Charles Lineweaver, Susan Rosenberg, Julia A. Bos and Robert  
450 Austin for insightful discussions into the role of genomic instability and DNA repair in cancer. We  
451 also acknowledge the work of the clinical collaborators, data analysis teams, and funders generat-  
452 ing the WGS data in the Pan-Cancer Analysis Working Group of the International Cancer Genome  
453 Consortium and the Complete Genomics Indices database in the 1000 Genome Project database.

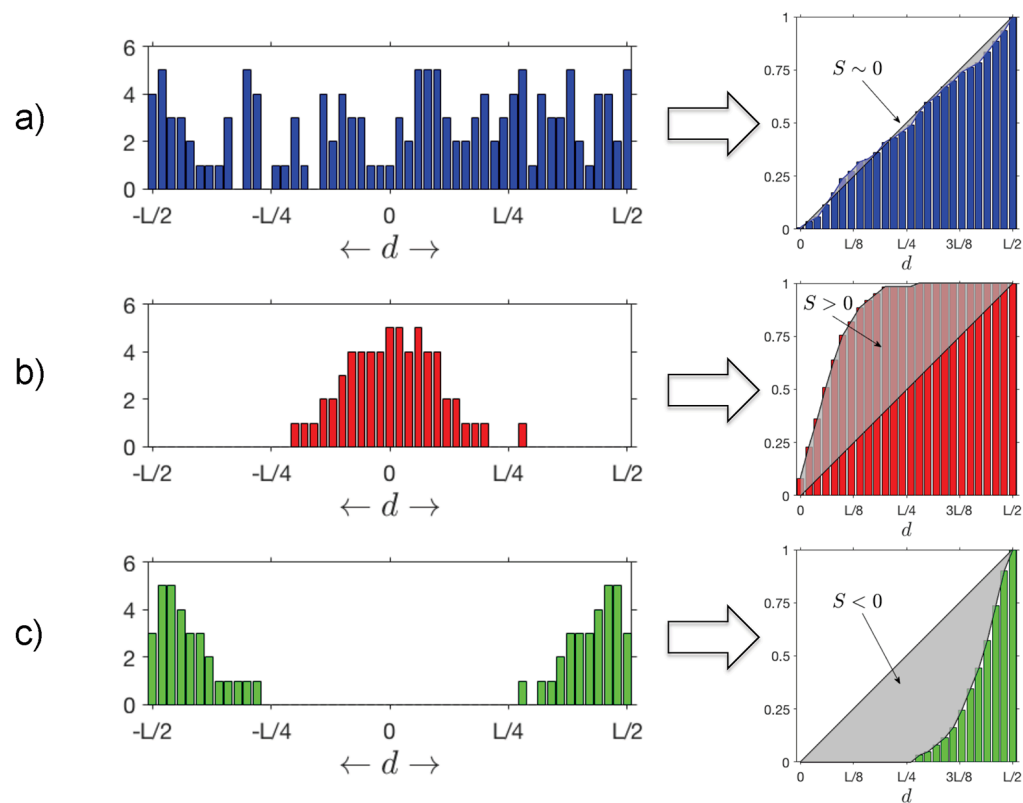

**Figure 6. SitH Scores.** Different outcomes for distributions of mutations as a function to the distance  $d$  to cluster centroids. a) Uniformly distributed mutations yield a linear cumulative distribution and  $S \sim 0$ , while b)  $S > 0$  signifies a bell-shaped distribution of mutations around the centroid, and c)  $S < 0$  signifies a distribution of mutations that increase with the distance to the centroid.

## References

- 454  
455 **Alexandrov LB**, Nik-Zainal S, Wedge DC, Sajr A, Behjati S, Biankin AV, et al. Signatures of mutational processes  
456 in human cancer. *Nature*. 2013; 500:415–21.
- 457 **Alexandrov LB**, Kim J, Haradhvala NJ, Huang MN, Tian Ng AW, Wu Y, Boot A, Covington KR, Gordenin DA,  
458 Bergstrom EN, Islam SMA, Lopez-Bigas N, Klimczak LJ, McPherson JR, Morganella S, Sabarinathan R, Wheeler  
459 DA, Mustonen V, Getz G, Rozen SG, et al. The repertoire of mutational signatures in human cancer. *Nature*.  
460 2020 Feb; 578(7793):94–101. <http://www.nature.com/articles/s41586-020-1943-3>, doi: 10.1038/s41586-020-  
461 1943-3.
- 462 **Alexandrov LB**, Stratton MR. Mutational signatures: the patterns of somatic mutations hidden in cancer  
463 genomes. *Current Opinion in Genetics & Development*. 2014 Feb; 24:52–60. [https://linkinghub.elsevier.com/  
464 retrieve/pii/S0959437X13001639](https://linkinghub.elsevier.com/retrieve/pii/S0959437X13001639), doi: 10.1016/j.gde.2013.11.014.
- 465 **and T**. Pan-cancer analysis of whole genomes. *Nature*. 2020 Feb; 578(7793):82–93. [http://www.nature.com/  
466 articles/s41586-020-1969-6](http://www.nature.com/articles/s41586-020-1969-6), doi: 10.1038/s41586-020-1969-6.
- 467 **Andor N**, Graham TA, Jansen M, Xia LC, Aktipis CA, Petritsch C, et al. Pan-cancer analysis of the extent and  
468 consequences of intratumor heterogeneity. *Nat Med*. 2016; 22:105–13.
- 469 **Baez-Ortega A**, Gori K. Computational approaches for discovery of mutational signatures in cancer. *Brief-*  
470 *ings in Bioinformatics*. 2019 Jan; 20(1):77–88. <https://academic.oup.com/bib/article/20/1/77/4056408>, doi:  
471 10.1093/bib/bbx082.
- 472 **Ben-David U**, Amon A. Context is everything: aneuploidy in cancer. *Nature Reviews Genetics*. 2019 sep;  
473 21(1):44–62. <https://doi.org/10.1038/s41576-019-0171-x>, doi: 10.1038/s41576-019-0171-x.
- 474 **Buisson R**, Langenbucher A, Bowen D, Kwan EE, Benes CH, Zou L, Lawrence MS. Passenger hotspot mutations  
475 in cancer driven by APOBEC3A and mesoscale genomic features. *Science*. 2019 Jun; 364(6447):eaaw2872.  
476 <https://www.sciencemag.org/lookup/doi/10.1126/science.aaw2872>, doi: 10.1126/science.aaw2872.
- 477 **Burns MB**, Temiz NA, Rs H. Evidence for APOBEC3B mutagenesis in multiple human cancers. *Nat Genet*. 2013;  
478 45:977–83.
- 479 **Campbell BB**, Light N, Fabrizio D, Zatzman M, Fuligni F, de Borja R, Davidson S, Edwards M, Elvin JA, Hodel KP,  
480 Zahurancik WJ, Suo Z, Lipman T, Wimmer K, Kratz CP, Bowers DC, Laetsch TW, Dunn GP, Johanns TM, Grimmer  
481 MR, et al. Comprehensive Analysis of Hypermutation in Human Cancer. *Cell*. 2017 Nov; 171(5):1042–  
482 1056.e10. <https://linkinghub.elsevier.com/retrieve/pii/S009286741731142X>, doi: 10.1016/j.cell.2017.09.048.
- 483 **Campbell B**, Galati M, Stone S, Riemenschneider A, Edwards M, Sudhaman S, Siddaway R, Komosa M, Nunes  
484 N, Nobre L, Morrissy AS, Zatzman M, Zapotocky M, Joksimovic L, Kalimuthu S, Samuel D, Mason G, Bouffet  
485 E, Morgenstern D, Aronson M, et al. Mutations in the RAS/MAPK pathway drive replication repair deficient  
486 hypermutated tumors and confer sensitivity to MEK inhibition. *Cancer Discov; Cancer Discovery*. 2021; .
- 487 **Chen JM**, Férec C, Cooper DN. Closely spaced multiple mutations as potential signatures of transient hyper-  
488 mutability in human genes. *Human Mutation*. 2009; 30:1435–48.
- 489 **Chen Z**, Wen W, Bao J, Kuhs KL, Cai Q, Long J, Shu Xo, Zheng W, Guo X. Integrative genomic analyses of APOBEC-  
490 mutational signature, expression and germline deletion of APOBEC3 genes, and immunogenicity in multiple  
491 cancer types. *BMC Medical Genomics*. 2019 Dec; 12(1):131. [https://bmcmcdgenomics.biomedcentral.com/  
492 articles/10.1186/s12920-019-0579-3](https://bmcmcdgenomics.biomedcentral.com/articles/10.1186/s12920-019-0579-3), doi: 10.1186/s12920-019-0579-3.
- 493 **Cinlar E**. *Introduction to Stochastic Processes*. Englewood Cliffs, New Jersey: Prentice-Hall, Inc.; 1975.
- 494 **Cipponi A**, Goode DL, Bedo J, McCabe MJ, Pajic M, Croucher DR, Rajal AG, Junankar SR, Saunders DN,  
495 Lobachevsky P, Papenfuss AT, Nessem D, Nobis M, Warren SC, Timpson P, Cowley M, Vargas AC, Qiu MR,  
496 Generali DG, Keerthikumar S, et al. MTOR signaling orchestrates stress-induced mutagenesis, facilitating  
497 adaptive evolution in cancer. *Science*. 2020 Jun; 368(6495):1127–1131. [https://www.sciencemag.org/lookup/  
498 doi/10.1126/science.aau8768](https://www.sciencemag.org/lookup/doi/10.1126/science.aau8768), doi: 10.1126/science.aau8768.
- 499 **Cisneros L**, Bussey KJ, Orr AJ, Miočević M, Lineweaver CH, Davies PC. Ancient genes establish stress-induced  
500 mutation as a hallmark of cancer. *PLOS ONE*. 2017; 12:e0176258.
- 501 **Cortés-Ciriano I**, Lee JJK, Xi R, Jain D, Jung YL, Yang L, Gordenin D, Klimczak LJ, Zhang CZ, Pellman DS, Park PJ.  
502 Comprehensive analysis of chromothripsis in 2,658 human cancers using whole-genome sequencing. *Nature*  
503 *Genetics*. 2020 Mar; 52(3):331–341. <http://www.nature.com/articles/s41588-019-0576-7>, doi: 10.1038/s41588-  
504 019-0576-7.

- 505 **Dagogo-Jack I**, Shaw AT. Tumour heterogeneity and resistance to cancer therapies. *Nature Reviews Clinical Oncology*. 2017 nov; 15(2):81–94. <https://doi.org/10.1038/nrclinonc.2017.166>, doi: 10.1038/nrclinonc.2017.166.
- 508 **Davoli T**, Uno H, Wooten EC, Sj E. Tumor aneuploidy correlates with markers of immune evasion and with reduced response to immunotherapy. *Science*. 2017; 355:eaaf8399.
- 510 **Dodgshun AJ**, Fukuoka K, Edwards M, Bianchi VJ, Das A, Sexton-Oates A, Larouche V, Vanan MI, Lindhorst S, Yalon M, Mason G, Crooks B, Constantini S, Massimino M, Chiaravalli S, Ramdas J, Mason W, Ashraf S, Farah R, Damme AV, et al. Germline-driven replication repair-deficient high-grade gliomas exhibit unique hypomethylation patterns. *Acta Neuropathologica*. 2020 sep; 140(5):765–776. <https://doi.org/10.1007/s00401-020-02209-8>, doi: 10.1007/s00401-020-02209-8.
- 515 **Drake JW**. Mutations in clusters and showers. *Proc Natl Acad Sci*. 2007; 104:8203–4.
- 516 **Fitzgerald DM**, Hastings PJ, Sm R. Stress-Induced Mutagenesis: Implications in Cancer and Drug Resistance. *Annual Review of Cancer Biology*. 2017; 1:119–140.
- 518 **Forment JV**, O'Connor MJ. Targeting the replication stress response in cancer. *Pharmacology and Therapeutics*. 2018; 188:155–167. <https://www.sciencedirect.com/science/article/pii/S0163725818300536>, doi: <https://doi.org/10.1016/j.pharmthera.2018.03.005>.
- 521 **Foster P**. Stress-Induced Mutagenesis in Bacteria. *Crit Rev Biochem Mol Biol*. 2007; 42:373–397.
- 522 **Goldmann JM**, Wong WSW, Pinelli M, Farrah T, Bodian D, Stittrich AB, Glusman G, Vissers LELM, Hoischen A, Roach JC, Vockley JG, Veltman JA, Solomon BD, Gilissen C, Niederhuber JE. Parent-of-origin-specific signatures of de novo mutations. *Nature Genetics*. 2016 Aug; 48(8):935–939. <http://www.nature.com/articles/ng.3597>, doi: 10.1038/ng.3597.
- 526 **Goldmann JM**, Veltman JA, Gilissen C. De Novo Mutations Reflect Development and Aging of the Human Germline. *Trends in Genetics*. 2019 Nov; 35(11):828–839. <https://linkinghub.elsevier.com/retrieve/pii/S0168952519301787>, doi: 10.1016/j.tig.2019.08.005.
- 529 **Haradhvala NJ**, Polak P, Stojanov P, Covington KR, Shinbrot E, Hess JM, Rheinbay E, Kim J, Maruvka YE, Braunschtein LZ, Kamburov A, Hanawalt PC, Wheeler DA, Koren A, Lawrence MS, Getz G. Mutational Strand Asymmetries in Cancer Genomes Reveal Mechanisms of DNA Damage and Repair. *Cell*. 2016 Jan; 164(3):538–549. <http://www.sciencedirect.com/science/article/pii/S0092867415017146>, doi: 10.1016/j.cell.2015.12.050.
- 533 **Harris K**. The randomness that shapes our DNA. *eLife*. 2018 Oct; 7:e41491. <https://elifesciences.org/articles/41491>, doi: 10.7554/eLife.41491.
- 535 **Harris K**, Nielsen R. Error-prone polymerase activity causes multinucleotide mutations in humans. *Genome Research*. 2014 Sep; 24(9):1445–1454. <http://www.ncbi.nlm.nih.gov/pmc/articles/PMC4158752/>, doi: 10.1101/gr.170696.113.
- 538 **Helleday T**, Eshtad S, Nik-Zainal S. Mechanisms underlying mutational signatures in human cancers. *Nature Reviews Genetics*. 2014 Sep; 15(9):585–598. <http://www.nature.com/articles/nrg3729>, doi: 10.1038/nrg3729.
- 540 **Hu X**, Xu Z, De S. Characteristics of mutational signatures of unknown etiology. *NAR Cancer*. 2020 Sep; 2(3):zcaa026. <https://academic.oup.com/narcancer/article/doi/10.1093/narcan/zcaa026/5911782>, doi: 10.1093/narcan/zcaa026.
- 543 **Janion C**. Inducible SOS Response System of DNA Repair and Mutagenesis in *Escherichia coli*. *Int J Biol Sci*. 2008; 4:338–344.
- 545 **Jia P**, Pao W, Zhao Z. Patterns and processes of somatic mutations in nine major cancers. *BMC Medical Genomics*. 2014 Dec; 7(1):11. <http://bmcmmedgenomics.biomedcentral.com/articles/10.1186/1755-8794-7-11>, doi: 10.1186/1755-8794-7-11.
- 548 **Jin ZB**, Li Z, Liu Z, Jiang Y, Cai XB, Wu J. Identification of *de novo* germline mutations and causal genes for sporadic diseases using trio-based whole-exome/genome sequencing: Trio-based de novo mutations detection. *Biological Reviews*. 2018 May; 93(2):1014–1031. <http://doi.wiley.com/10.1111/brv.12383>, doi: 10.1111/brv.12383.
- 551 **Jónsson H**, Sulem P, Kehr B, Kristmundsdottir S, Zink F, Hjartarson E, Hardarson MT, Hjorleifsson KE, Eggertsson HP, Gudjonsson SA, Ward LD, Arnadottir GA, Helgason EA, Helgason H, Gylfason A, Jonasdottir A, Jonasdottir A, Rafnar T, Frigge M, Stacey SN, et al. Parental influence on human germline de novo mutations in 1,548 trios from Iceland. *Nature*. 2017 Sep; 549(7673):519–522. <http://www.nature.com/articles/nature24018>, doi: 10.1038/nature24018.



- 556 **Kamburov A**, Lawrence MS, Polak P, Leshchiner I, Lage K, Golub TR, Lander ES, Getz G. Comprehensive assess-  
557 ment of cancer missense mutation clustering in protein structures. *Proc Natl Acad Sci*. 2015; 112:E5486-  
558 E5495.
- 559 **Khurana E**, Fu Y, Colonna V, Mu XJ, Kang HM, Lappalainen T, Sboner A, Lochovsky L, Chen J, Harmanci A, Das J,  
560 Abyzov A, Balasubramanian S, Beal K, Chakravarty D, Challis D, Chen Y, Clarke D, Clarke L, Cunningham F, et al.  
561 Integrative Annotation of Variants from 1092 Humans: Application to Cancer Genomics. *Science*. 2013 Oct;  
562 342(6154):1235587. <http://www.sciencemag.org/content/342/6154/1235587>, doi: 10.1126/science.1235587.
- 563 **Lada AG**, Dhar A, Boissy RJ, Hirano M, Rubel AA, Rogozin IB, et al. AID/APOBEC cytosine deaminase induces  
564 genome-wide kataegis. *Biol Direct*. 2012; 7.
- 565 **Li Y**, Roberts ND, Wala JA, Shapira O, Schumacher SE, Kumar K, Khurana E, Waszak S, Korbel JO, Haber JE,  
566 Imielinski M, Weischenfeldt J, Beroukhim R, Campbell PJ. Patterns of somatic structural variation in human  
567 cancer genomes. *Nature*. 2020 Feb; 578(7793):112–121. <http://www.nature.com/articles/s41586-019-1913-9>,  
568 doi: 10.1038/s41586-019-1913-9.
- 569 **Ma J**, Setton J, Lee NY, Riaz N, Powell SN. The therapeutic significance of mutational signatures from DNA repair  
570 deficiency in cancer. *Nature Communications*. 2018 aug; 9(1). <https://doi.org/10.1038/s41467-018-05228-y>,  
571 doi: 10.1038/s41467-018-05228-y.
- 572 **McKenzie GJ**, Harris RS, Lee PL, Sm R. The SOS response regulates adaptive mutation. *Proc Natl Acad Sci*. 2000;  
573 97:6646–51.
- 574 **Moore DF**. *Applied Survival Analysis Using R*. Switzerland: Springer International Publishing; 2016.
- 575 **Murai J**. Targeting DNA repair and replication stress in the treatment of ovarian cancer. *International*  
576 *Journal of Clinical Oncology*. 2017 jun; 22(4):619–628. <https://doi.org/10.1007/s10147-017-1145-7>, doi:  
577 10.1007/s10147-017-1145-7.
- 578 **Nik-Zainal S**, Alexandrov LB, Wedge DC, Loo PV, Greenman CD, Raine K, et al. Mutational Processes Molding  
579 the Genomes of 21 Breast Cancers. *Cell*. 2012; 149:979–93.
- 580 **Nik-Zainal S**, Davies H, Staaf J, Ramakrishna M, Glodzik D, Zou X, et al. Landscape of somatic mutations in 560  
581 breast cancer whole-genome sequences. *Nature*. 2016; 534:47–54.
- 582 **Noorani A**, Bornschein J, Lynch AG, Secrier M, Achilleos A, Eldridge M, Bower L, Weaver JM, Crawte J, Ong  
583 CA, Shannon N, MacRae S, Grehan N, Nutzinger B, O'Donovan M, Hardwick R, Tavaré S, Fitzgerald RC,  
584 Consortium obotOCCaMSO, Elliott RF, et al. A comparative analysis of whole genome sequencing of  
585 esophageal adenocarcinoma pre- and post-chemotherapy. *Genome Research*. 2017 Jun; 27(6):902–912.  
586 <http://genome.cshlp.org/content/27/6/902>, doi: 10.1101/gr.214296.116.
- 587 **Patch AM**, Christie EL, Etemadmoghadam D, Garsed DW, George J, Fereday S, Nones K, Cowin P, Alsop K, Bailey  
588 PJ, Kassahn KS, Newell F, Quinn MCJ, Kazakoff S, Quek K, Wilhelm-Benartzi C, Curry E, Leong HS, Hamilton  
589 A, Mileskin L, et al. Whole-genome characterization of chemoresistant ovarian cancer. *Nature*. 2015 May;  
590 521(7553):489–494. <http://www.nature.com/articles/nature14410>, doi: 10.1038/nature14410.
- 591 **Petljak M**, Alexandrov LB, Brummel JS, Price S, Wedge DC, Grossmann S, Dawson KJ, Ju YS, Iorio F, Tubio JMC,  
592 Koh CC, Georgakopoulos-Soares I, Rodríguez-Martín B, Otlu B, O'Meara S, Butler AP, Menzies A, Bhosle SG,  
593 Raine K, Jones DR, et al. Characterizing Mutational Signatures in Human Cancer Cell Lines Reveals Episodic  
594 APOBEC Mutagenesis. *Cell*. 2019 Mar; 176(6):1282–1294.e20. [https://linkinghub.elsevier.com/retrieve/pii/  
595 S0092867419301618](https://linkinghub.elsevier.com/retrieve/pii/S0092867419301618), doi: 10.1016/j.cell.2019.02.012.
- 596 **Phillips DH**. Mutational spectra and mutational signatures: Insights into cancer aetiology and mechanisms  
597 of DNA damage and repair. *DNA Repair*. 2018 Nov; 71:6–11. [https://linkinghub.elsevier.com/retrieve/pii/  
598 S156878641830168X](https://linkinghub.elsevier.com/retrieve/pii/S156878641830168X), doi: 10.1016/j.dnarep.2018.08.003.
- 599 **Poulos RC**, Wong YT, Ryan R, Pang H, Wong JWH. Analysis of 7,815 cancer exomes reveals associations between  
600 mutational processes and somatic driver mutations. *PLOS Genetics*. 2018 Nov; 14(11):e1007779. [https://  
601 dx.plos.org/10.1371/journal.pgen.1007779](https://dx.plos.org/10.1371/journal.pgen.1007779), doi: 10.1371/journal.pgen.1007779.
- 602 **Pouyet F**, Aeschbacher S, Thiéry A, Excoffier L. Background selection and biased gene conversion affect more  
603 than 95% of the human genome and bias demographic inferences. *eLife*. 2018 Aug; 7:e36317. [https://  
604 elifesciences.org/articles/36317](https://elifesciences.org/articles/36317), doi: 10.7554/eLife.36317.
- 605 **Ram Y**, Hadany L. Stress-induced mutagenesis and complex adaptation. *Proc R Soc Lond B Biol Sci*. 2014;  
606 281:20141025.

- 607 **Ram Y**, Hadany L. Evolution of Stress-Induced Mutagenesis in the Presence of Horizontal Gene Transfer. The  
608 American Naturalist. 2019 Jul; 194(1):73–89. <https://www.journals.uchicago.edu/doi/10.1086/703457>, doi:  
609 10.1086/703457.
- 610 **Rheinbay E**, Nielsen MM, Abascal F, Wala JA, Shapira O, Tiao G, Hornshøj H, Hess JM, Juul RI, Lin Z, Feuerbach  
611 L, Sabarinathan R, Madsen T, Kim J, Mularoni L, Shuai S, Lanzós A, Herrmann C, Maruvka YE, Shen C, et al.  
612 Analyses of non-coding somatic drivers in 2,658 cancer whole genomes. Nature. 2020 Feb; 578(7793):102–  
613 111. <http://www.nature.com/articles/s41586-020-1965-x>, doi: 10.1038/s41586-020-1965-x.
- 614 **Roberts SA**, Lawrence MS, Klimczak LJ, Grimm SA, Fargo D, Stojanov P, et al. An APOBEC cytidine deaminase  
615 mutagenesis pattern is widespread in human cancers. Nat Genet. 2013; 45:970–6.
- 616 **Roberts SA**, Sterling J, Thompson C, Harris S, Mav D, Shah R, Klimczak LJ, Kryukov GV, Malc E, Mieczkowski PA,  
617 Resnick MA, Gordenin DA. Clustered Mutations in Yeast and in Human Cancers Can Arise from Damaged  
618 Long Single-Strand DNA Regions. Molecular Cell. 2012 May; 46(4):424–435. [https://linkinghub.elsevier.com/  
619 retrieve/pii/S1097276512002997](https://linkinghub.elsevier.com/retrieve/pii/S1097276512002997), doi: 10.1016/j.molcel.2012.03.030.
- 620 **Roh W**, P-I C, Reuben A, Spencer CN, Prieto PA, Miller JP, et al. Integrated molecular analysis of tumor biopsies  
621 on sequential CTLA-4 and PD-1 blockade reveals markers of response and resistance. Sci Transl Med. 2017;  
622 9:eaa3560.
- 623 **Roper N**, Gao S, Maity TK, Banday AR, Zhang X, Venugopalan A, Cultraro CM, Patidar R, Sindiri S, Brown AL,  
624 Goncareenco A, Panchenko AR, Biswas R, Thomas A, Rajan A, Carter CA, Kleiner DE, Hewitt SM, Khan J,  
625 Prokunina-Olsson L, et al. APOBEC Mutagenesis and Copy-Number Alterations Are Drivers of Proteogenomic  
626 Tumor Evolution and Heterogeneity in Metastatic Thoracic Tumors. Cell Reports. 2019 Mar; 26(10):2651–  
627 2666.e6. <https://linkinghub.elsevier.com/retrieve/pii/S2211124719301998>, doi: 10.1016/j.celrep.2019.02.028.
- 628 **Roschke AV**, Lababidi S, Tonon G, Gehlhaus KS, Bussey K, Weinstein JN, Ir K. Karyotypic “state” as a potential  
629 determinant for anticancer drug discovery. Proc Natl Acad Sci U S A. 2005; 102:2964–2969.
- 630 **Roschke AV**, Stover K, Tonon G, Schaffer AA, Ir K. Stable Karyotypes in Epithelial Cancer Cell Lines Despite  
631 High Rates of Ongoing Structural and Numerical Chromosomal Instability. Neoplasia. 2002; 4:19–31.
- 632 **Roschke AV**, Tonon G, Gehlhaus KS, McTyre N, Bussey KJ, Lababidi S, et al. Karyotypic complexity of the NCI-60  
633 drug-screening panel. Cancer Res. 2003; 63:8634–8647.
- 634 **Rosenberg SM**, Shee C, Frisch RL, Pj H. Stress-induced mutation via DNA breaks in Escherichia coli: A molecular  
635 mechanism with implications for evolution and medicine. BioEssays. 2012; 34:885–92.
- 636 **Russo M**, Crisafulli G, Sogari A, Reilly NM, Arena S, Lamba S, Bartolini A, Amodio V, Magri A, Novara L, Sarotto  
637 I, Nagel ZD, Piatt CG, Amatu A, Sartore-Bianchi A, Siena S, Bertotti A, Trusolino L, Corigliano M, Gherardi  
638 M, et al. Adaptive mutability of colorectal cancers in response to targeted therapies. Science. 2019 Dec;  
639 366(6472):1473–1480. <https://www.sciencemag.org/lookup/doi/10.1126/science.aav4474>, doi: 10.1126/sci-  
640 ence.aav4474.
- 641 **Saini N**, Gordenin DA. Somatic mutation load and spectra: A record of DNA damage and repair in healthy  
642 human cells: Human Somatic Mutation Load and Spectra. Environmental and Molecular Mutagenesis. 2018  
643 Oct; 59(8):672–686. <http://doi.wiley.com/10.1002/em.22215>, doi: 10.1002/em.22215.
- 644 **Sakofsky CJ**, Ayyar S, Deem AK, W-h C, Ira G, Malkova A. Translesion Polymerases Drive Microhomology-  
645 Mediated Break-Induced Replication Leading to Complex Chromosomal Rearrangements. Mol Cell. 2015;  
646 60:860–72.
- 647 **Scarpa A**, , Chang DK, Nones K, Corbo V, Patch AM, Bailey P, Lawlor RT, Johns AL, Miller DK, Mafficini A, Rusev  
648 B, Scardoni M, Antonello D, Barbi S, Sikora KO, Cingarlini S, Vicentini C, McKay S, Quinn MCJ, et al. Whole-  
649 genome landscape of pancreatic neuroendocrine tumours. Nature. 2017 feb; 543(7643):65–71. [https://doi.  
650 org/10.1038/nature21063](https://doi.org/10.1038/nature21063), doi: 10.1038/nature21063.
- 651 **Shee C**, Gibson JL, Sm R. Two Mechanisms Produce Mutation Hotspots at DNA Breaks in Escherichia coli. Cell  
652 Rep. 2012; 2:714–21.
- 653 **Shi MJ**, Meng XY, Fontugne J, Chen CL, Radvanyi F, Bernard-Pierrot I. Identification of new driver and  
654 passenger mutations within APOBEC-induced hotspot mutations in bladder cancer. Genome Medicine.  
655 2020 Dec; 12(1):85. <https://genomemedicine.biomedcentral.com/articles/10.1186/s13073-020-00781-y>, doi:  
656 10.1186/s13073-020-00781-y.

- 657 **Srivastava AK**, Han C, Zhao R, Cui T, Dai Y, Mao C, et al. Enhanced expression of DNA polymerase eta con-  
658 tributes to cisplatin resistance of ovarian cancer stem cells. *Proc Natl Acad Sci.* 2015; 112:4411–6.
- 659 **Supek F**, Lehner B. Differential DNA mismatch repair underlies mutation rate variation across the human  
660 genome. *Nature.* 2015; 521:81–4.
- 661 **Supek F**, Lehner B. Clustered Mutation Signatures Reveal that Error-Prone DNA Repair Targets Mutations to Ac-  
662 tive Genes. *Cell.* 2017 Jul; 170(3):534–547.e23. <https://linkinghub.elsevier.com/retrieve/pii/S0092867417307742>,  
663 doi: 10.1016/j.cell.2017.07.003.
- 664 **Taylor BJ**, Nik-Zainal S, Wu YL, Stebbings LA, Raine K, Campbell PJ, et al. DNA deaminases induce break-  
665 associated mutation showers with implication of APOBEC3B and 3A in breast cancer kataegis. *eLife.* 2013;  
666 2:e00534.
- 667 **Telis N**, Aguilar R, Harris K. Selection against archaic hominin genetic variation in regulatory regions. *Nature*  
668 *Ecology & Evolution.* 2020 Nov; 4(11):1558–1566. <http://www.nature.com/articles/s41559-020-01284-0>, doi:  
669 10.1038/s41559-020-01284-0.
- 670 **Temprine K**, Campbell NR, Huang R, Langdon EM, Simon-Vermot T, Mehta K, Clapp A, Chipman M, White RM.  
671 Regulation of the error-prone DNA polymerase Pol $\kappa$  by oncogenic signaling and its contribution to drug  
672 resistance. *Science Signaling.* 2020 Apr; 13(629):eaau1453. [https://stke.sciencemag.org/lookup/doi/10.1126/](https://stke.sciencemag.org/lookup/doi/10.1126/scisignal.aau1453)  
673 [scisignal.aau1453](https://stke.sciencemag.org/lookup/doi/10.1126/scisignal.aau1453), doi: 10.1126/scisignal.aau1453.
- 674 **Teng K**, Qiu M, Li Z, Luo H, Zeng Z, Luo R, et al. DNA polymerase  $\eta$  protein expression predicts treat-  
675 ment response and survival of metastatic gastric adenocarcinoma patients treated with oxaliplatin-based  
676 chemotherapy. *J Transl Med.* 2010; 8:126.
- 677 **The 1000 Genomes Project Consortium.** A global reference for human genetic variation. *Nature.* 2015;  
678 526:68–74. doi: 10.1038/nature15393.
- 679 **Turajlic S**, Sottoriva A, Graham T, Swanton C. Resolving genetic heterogeneity in cancer. *Nature Reviews*  
680 *Genetics.* 2019 mar; 20(7):404–416. <https://doi.org/10.1038%2Fs41576-019-0114-6>, doi: 10.1038/s41576-019-  
681 0114-6.
- 682 **Ubhi T**, Brown G. Exploiting DNA Replication Stress for Cancer Treatment. *Cancer Res; Cancer Research.* 2019;  
683 79(8):1730–1739.
- 684 **Waddell N**, Pajic M, Patch AM, Chang DK, Kassahn KS, Bailey P, Johns AL, Miller D, Nones K, Quek K, Quinn  
685 MCJ, Robertson AJ, Fadlullah MZH, Bruxner TJC, Christ AN, Harliwong I, Idrisoglu S, Manning S, Nourse C,  
686 Nourbakhsh E, et al. Whole genomes redefine the mutational landscape of pancreatic cancer. *Nature.* 2015  
687 Feb; 518(7540):495–501. <http://www.nature.com/articles/nature14169>, doi: 10.1038/nature14169.
- 688 **Wang J**, Gonzalez KD, Scaringe WA, Tsai K, Liu N, Gu D, Li W, Hill KA, Ss S. Evidence for mutation showers. *Proc*  
689 *Natl Acad Sci.* 2007; 104:8403–8408.
- 690 **Waters LS**, Minesinger BK, Wiltrot ME, D'Souza S, Woodruff RV, C WG. Eukaryotic translesion polymerases  
691 and their roles and regulation in DNA damage tolerance. *Microbiol Mol Biol Rev MMBR.* 2009; 73:134–54.
- 692 **Wu A**, Zhang Q, Lambert G, Khin Z, Gatenby RA, Kim JH, et al. Ancient hot and cold genes and chemotherapy  
693 resistance emergence. *Proc Natl Acad Sci.* 2015; 112:10467–10472.
- 694 **Xia J**, Chiu LY, Nehring RB, Bravo Núñez MA, Mei Q, Perez M, Zhai Y, Fitzgerald DM, Pribis JP, Wang Y, Hu  
695 CW, Powell RT, LaBonte SA, Jalali A, Matadamas Guzmán ML, Lentzsch AM, Szafran AT, Joshi MC, Richters  
696 M, Gibson JL, et al. Bacteria-to-Human Protein Networks Reveal Origins of Endogenous DNA Damage.  
697 *Cell.* 2019 Jan; 176(1-2):127–143.e24. <https://linkinghub.elsevier.com/retrieve/pii/S0092867418316222>, doi:  
698 10.1016/j.cell.2018.12.008.
- 699 **Ye J**, Pavlicek A, Lunney EA, Rejto PA, Teng CH. Statistical method on nonrandom clustering with applica-  
700 tion to somatic mutations in cancer. *BMC Bioinformatics.* 2010 Dec; 11(1):11. [https://bmcbioinformatics.](https://bmcbioinformatics.biomedcentral.com/articles/10.1186/1471-2105-11-11)  
701 [biomedcentral.com/articles/10.1186/1471-2105-11-11](https://bmcbioinformatics.biomedcentral.com/articles/10.1186/1471-2105-11-11), doi: 10.1186/1471-2105-11-11.
- 702 **Zhang L**, Vijg J. Somatic Mutagenesis in Mammals and Its Implications for Human Disease and Ag-  
703 ing. *Annual Review of Genetics.* 2018 Nov; 52(1):397–419. [https://www.annualreviews.org/doi/10.1146/](https://www.annualreviews.org/doi/10.1146/annurev-genet-120417-031501)  
704 [annurev-genet-120417-031501](https://www.annualreviews.org/doi/10.1146/annurev-genet-120417-031501), doi: 10.1146/annurev-genet-120417-031501.

705 **Zhou W**, Chen Y, Liu X, Chu P, Loria S, Wang Y, et al. Expression of DNA translesion synthesis polymerase eta in  
706 head and neck squamous cell cancer predicts resistance to gemcitabine and cisplatin-based chemotherapy.  
707 PloS One. 2013; 8:e83978.

708 **Zhu H**, Swami U, Preet R, Zhang J. Harnessing DNA Replication Stress for Novel Cancer Therapy. Genes. 2020  
709 aug; 11(9):990. <https://doi.org/10.3390%2Fgenes11090990>, doi: 10.3390/genes11090990.

## 710 Appendix 1

### 711 Detailed tuple distributions

712 We consider a  $n$ -tuple as a set of  $n$  contiguous SNVs in genomic space with inter-SNV dis-  
713 tances  $x \leq D^*$  and  $D^* = 15$  kb. Then different values of  $n$  we observed numbers of  $n$ -tuples  
714 in simulated, normal and cancer data, shown in Figure 1. Singletons (1-tuples) are signifi-  
715 cantly underrepresented for low mutational loads, while tuples of size two or more are  
716 typically over-represented with respect to a Poisson point process model.

717 And interesting observation, in normal samples 2-tuples are the most extremely overrepre-  
718 sented, and the overrepresentation decays quickly with the tuple size. Tuples of size  $n = 4-5$   
719 are basically as frequently observed as expected. But in cancer samples tuples of all sizes  
720 are over-represented. In fact, perhaps large tuples sizes are even more extreme than small  
721 ones.

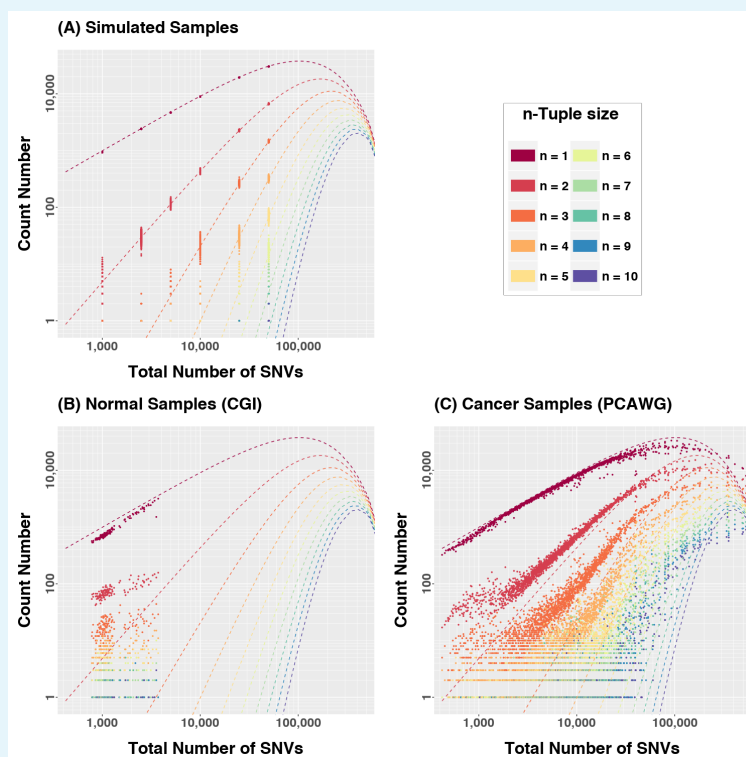

722 **Appendix 1 Figure 1.** Number of  $n$ -tuples in (A) simulated, (B) normal and (C) cancer samples.  
723 Singletons (1-tuples) are less frequent than expected in both normal and cancer cases, while larger  
724  $n$ -tuples are more frequent than expected. This relation is inverted for large mutational loads.  
725

## 727 Appendix 2

### 728 Precision in allele fraction estimations

729 The 95/95 binomial tolerance interval for a true allele fraction of 0.5 at a read depth as  
730 high as 60x ranges from 0.25 to 0.75 (Figure 1), meaning that random fluctuations in allele  
731 fraction estimations anywhere in that range cannot be ruled out. According to this much  
732 larger read depths are necessary to have the precision power to use allele fractions as a  
733 methods to estimate mutation lineages and discriminate varying degrees of heterogeneity  
734 across a tumor.

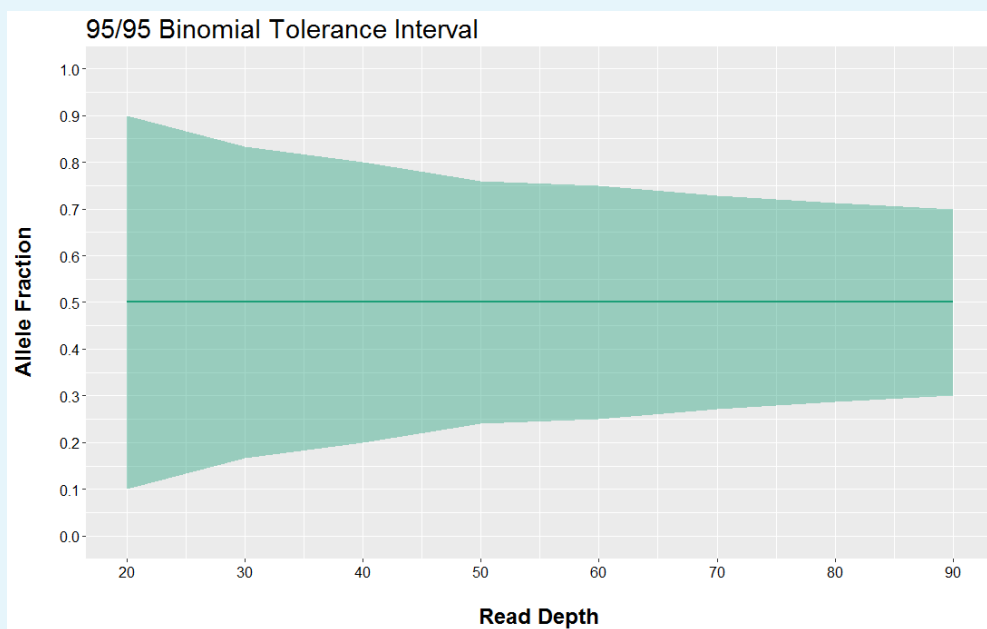

735  
736 **Appendix 2 Figure 1.** The shaded interval represents the bounds in which we are 95% confident that  
738 95% of the measurements of a true allele fraction of 0.5 will lie as a function of the real read depth.
